# Supplementary material for: Rapid near-term warming in a carbon neutral future attributed to substantial aerosol decline
Source: Copernicus journal article supplement (doi:10.5194/egusphere-2025-840), 2025-03-17
Supplement: Supplementary file 1 [file egusphere-2025-840-supplement.pdf]

**Table S1.** CMIP6 experiments and models used in this study.

| Experiment           | Description                                                                                                                                     | Model                                                                                                                                                                                                                                                                                                                                                                                                                                 |
|----------------------|-------------------------------------------------------------------------------------------------------------------------------------------------|---------------------------------------------------------------------------------------------------------------------------------------------------------------------------------------------------------------------------------------------------------------------------------------------------------------------------------------------------------------------------------------------------------------------------------------|
| historical           | CMIP6 historical simulation                                                                                                                     | CMCC-ESM2, ACCESS-CM2, ACCESS-ESM1-5, AWI-CM-1-1-MR, AWI-ESM-1-1-LR, BCC-CSM2-MR, BCC-ESM1, CAMS-CSM1-0, CanESM5, CanESM5-1, CAS-ESM2-0, CESM2, CESM2-WACCM, CMCC-CM2-HR4, CMCC-CM2-SR5, CMCC-ESM2, FGOALS-g3, FIO-ESM-2-0, GISS-E2-1-G, GISS-E2-1-H, GISS-E2-2-G, GISS-E2-2-H, IITM-ESM, MCM-UA-1-0, MIROC6, MPI-ESM-1-2-HAM, MPI-ESM1-2-HR, MPI-ESM1-2-LR, MRI-ESM2-0, NESM3, NorCPM1, NorESM2-LM, NorESM2-MM, SAM0-UNICON, TaiESM1 |
| hist-aer             | Anthropogenic-aerosol-only historical simulations                                                                                               |                                                                                                                                                                                                                                                                                                                                                                                                                                       |
| hist-GHG             | Well-mixed greenhouse-gas-only historical simulations                                                                                           | CanESM5, MRI-ESM2-0, BCC-CSM2-MR, CESM2, FGOALS-g3, MIROC6, GISS-E2-1-G                                                                                                                                                                                                                                                                                                                                                               |
| hist-nat             | Natural-only historical simulations (solar irradiance, stratospheric aerosol)                                                                   |                                                                                                                                                                                                                                                                                                                                                                                                                                       |
| hist-CO <sub>2</sub> | CO <sub>2</sub> -only historical simulations                                                                                                    | MIROC6, CanESM5                                                                                                                                                                                                                                                                                                                                                                                                                       |
| ssp245-aer           | Extension of at least one hist-aer simulation through the 21 <sup>st</sup> century using SSP2-4.5 tropospheric aerosol concentrations/emissions | NorESM2-LM, MIROC6, CanESM5                                                                                                                                                                                                                                                                                                                                                                                                           |
| ssp245-GHG           | Extension of at least one hist-GHG simulation through the 21 <sup>st</sup> century using the SSP2-4.5 greenhouse gas concentrations             | CanESM5, GISS-E2-1-G, IPSL-CM6A-LR, MIROC6, NorESM2-LM                                                                                                                                                                                                                                                                                                                                                                                |
| ssp119               | Carbon neutral scenario                                                                                                                         | CanESM5-1, CanESM5, GFDL-ESM4, FGOALS-g3, IPSL-CM6A-LR, MIROC6, MPI-ESM1-2-LR, MRI-ESM2-0                                                                                                                                                                                                                                                                                                                                             |
| ssp126               | Low emission scenario                                                                                                                           | CESM2-WACCM, TaiESM1, MRI-ESM2-0, MIROC6, KACE-1-0-G, IPSL-CM6A-LR, INM-CM5-0, INM-CM4-8, GFDL-ESM4, FGOALS-f3-L, CMCC-ESM2, CAS-ESM2-0, CanESM5, CanESM5-1, BCC-CSM2-MR, ACCESS-ESM1-5, ACCESS-CM2, CMCC-CM2-SR5                                                                                                                                                                                                                     |
| ssp245               | Medium emissions scenario                                                                                                                       |                                                                                                                                                                                                                                                                                                                                                                                                                                       |
| ssp370               | Medium to high emissions scenario                                                                                                               |                                                                                                                                                                                                                                                                                                                                                                                                                                       |
| ssp585               | High emission scenario                                                                                                                          |                                                                                                                                                                                                                                                                                                                                                                                                                                       |

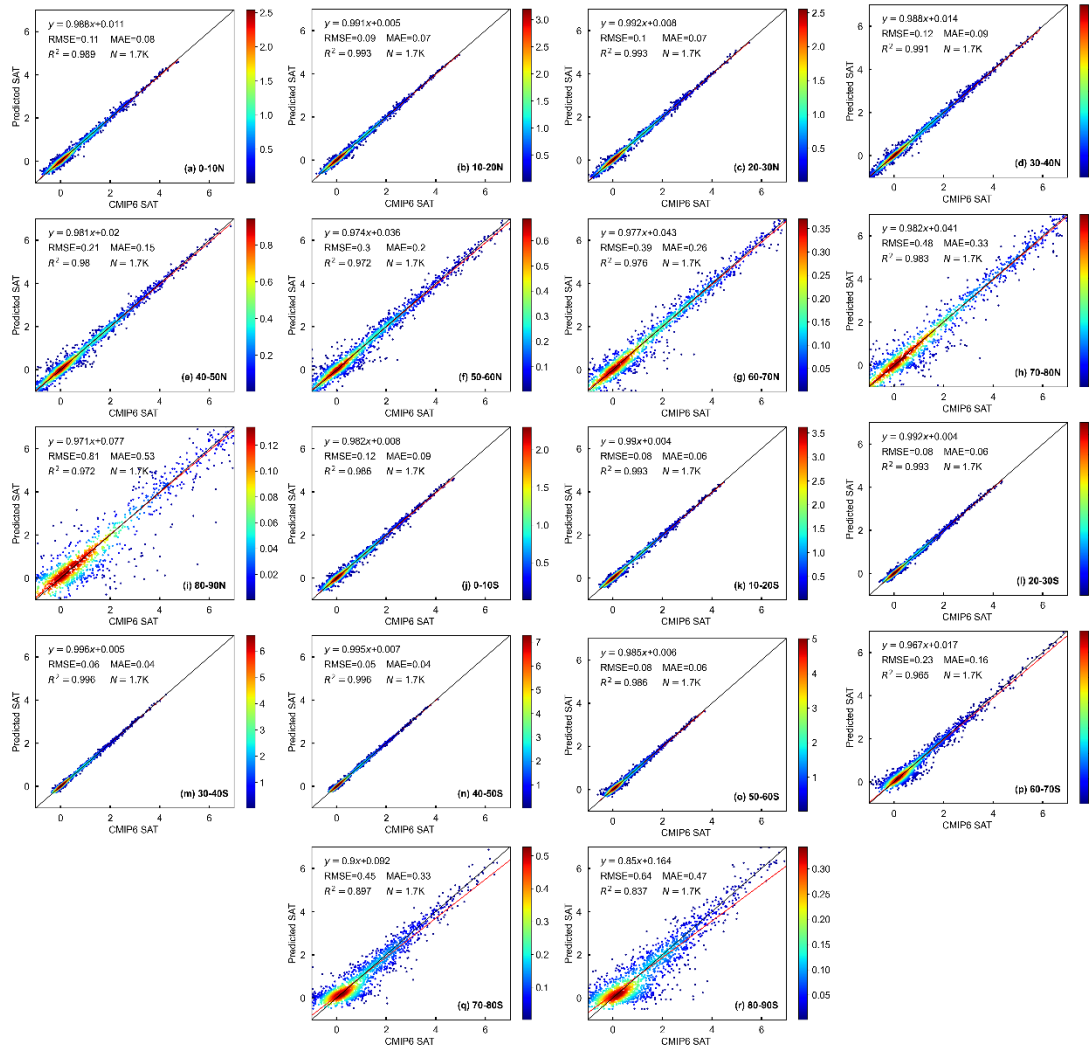

**Figure S1.** Scatterplot of the SAT density ( $^{\circ}\text{C}$ ) from CMIP6 multimodel simulations versus the predicted values from the LightGBM model for the eighteen latitudinal bands each spacing  $10^{\circ}$  from  $90^{\circ}\text{S}$  to  $90^{\circ}\text{N}$ , with color bars indicating the density of the data distribution. The black and red solid lines are the 1:1 lines and linear regression lines, respectively. Statistical metrics including RMSE, MAE, and  $R^2$  are given in the upper left corner of each panel.

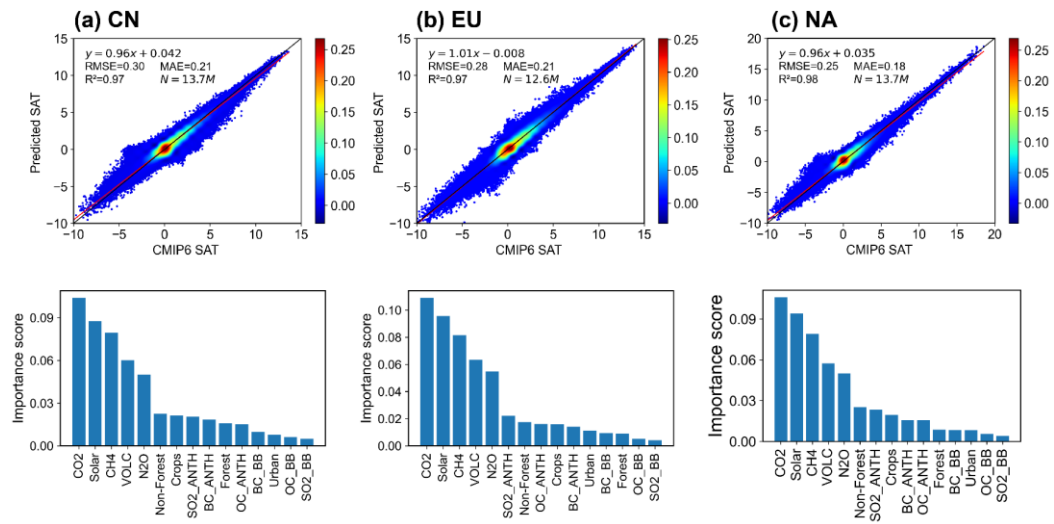

**Figure S2.** Scatterplot of the SAT density (°C) (top) and importance scores for the input variables (bottom) of the three regional LightGBM models for (a) China, (b) Europe and (c) North America.

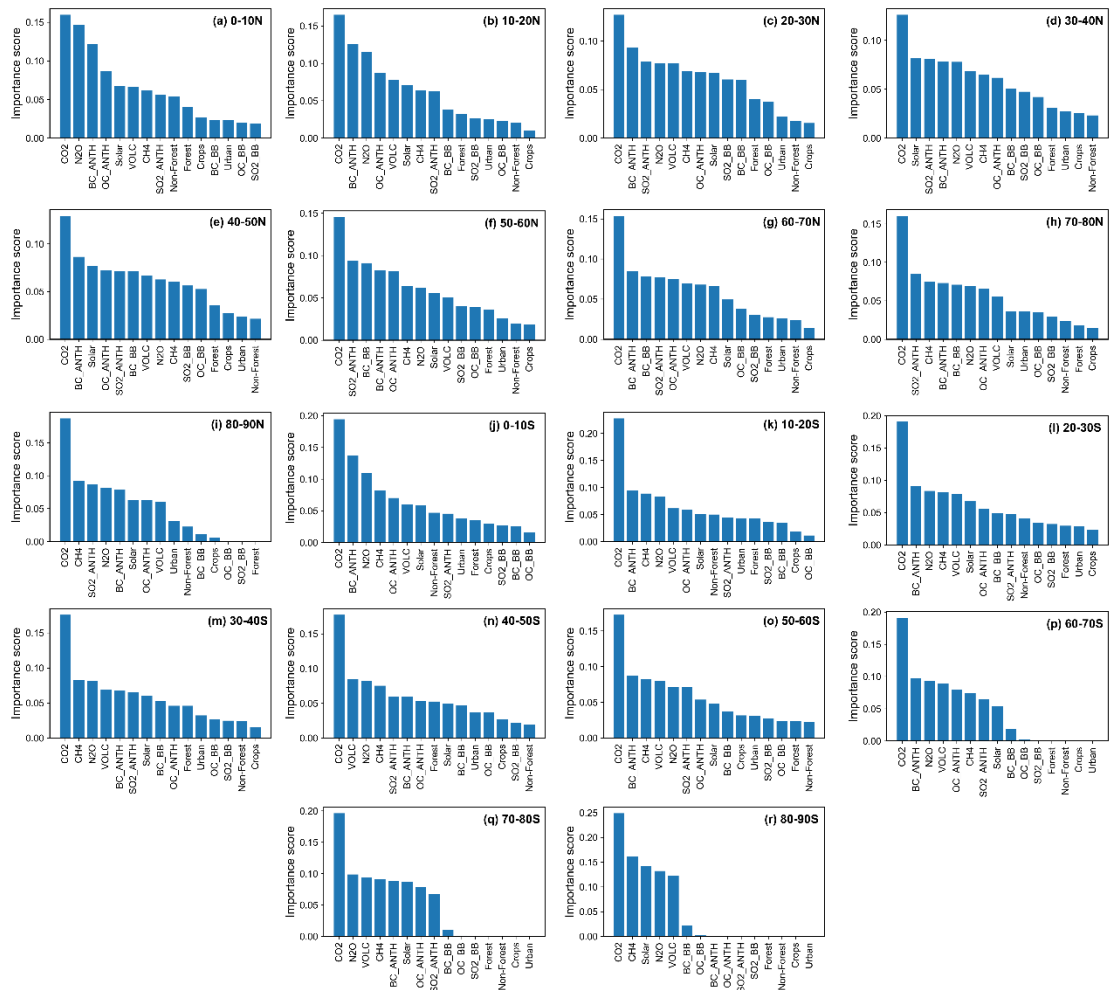

**Figure S3.** Importance scores for the input variables (aerosols, GHGs, land use, solar radiation and volcanic forcing) of the eighteen LightGBM models for the 18 latitudinal bands.

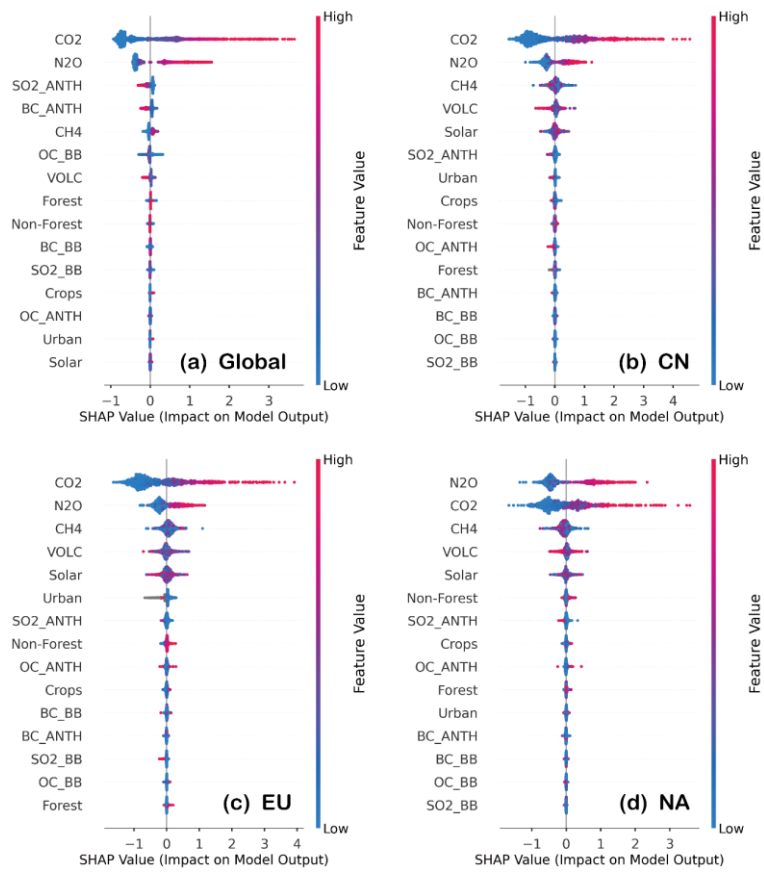

**Figure S4.** Shapley Additive Explanations (SHAP) values of LightGBM models for predicting (a) global and regional SAT over (b) China, (c) Europe, and (d) North America.

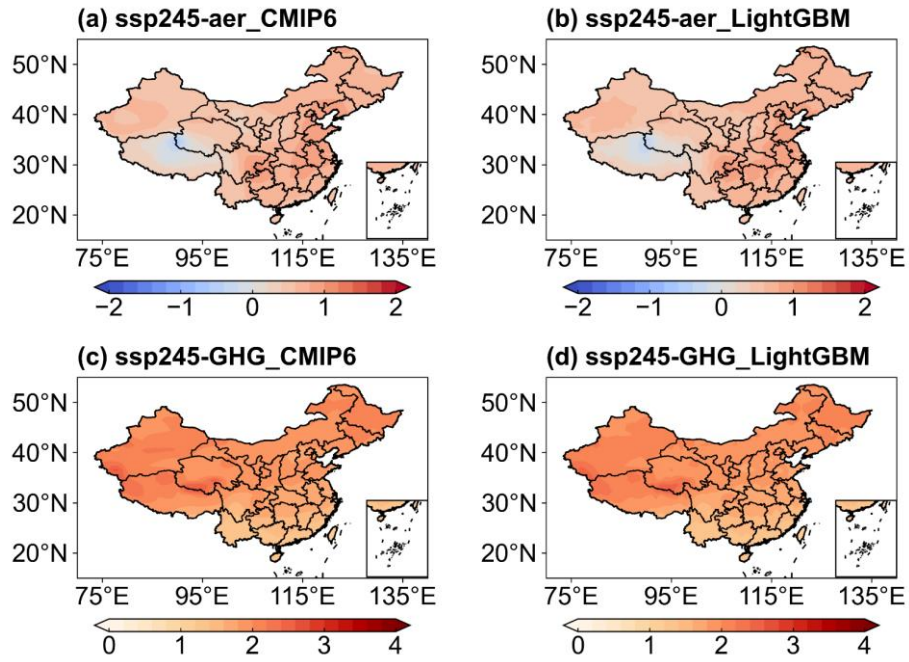

**Figure S5.** Changes in SAT ( $^{\circ}\text{C}$ ) in China in 2095 (2091-2100 average) relative to 2020 (2015-2024 average) due to (a, b) anthropogenic aerosol and (c, d) GHG changes in CMIP6 multi-model simulations (left) and LightGBM projections (right) in the SSP2-4.5 scenario.

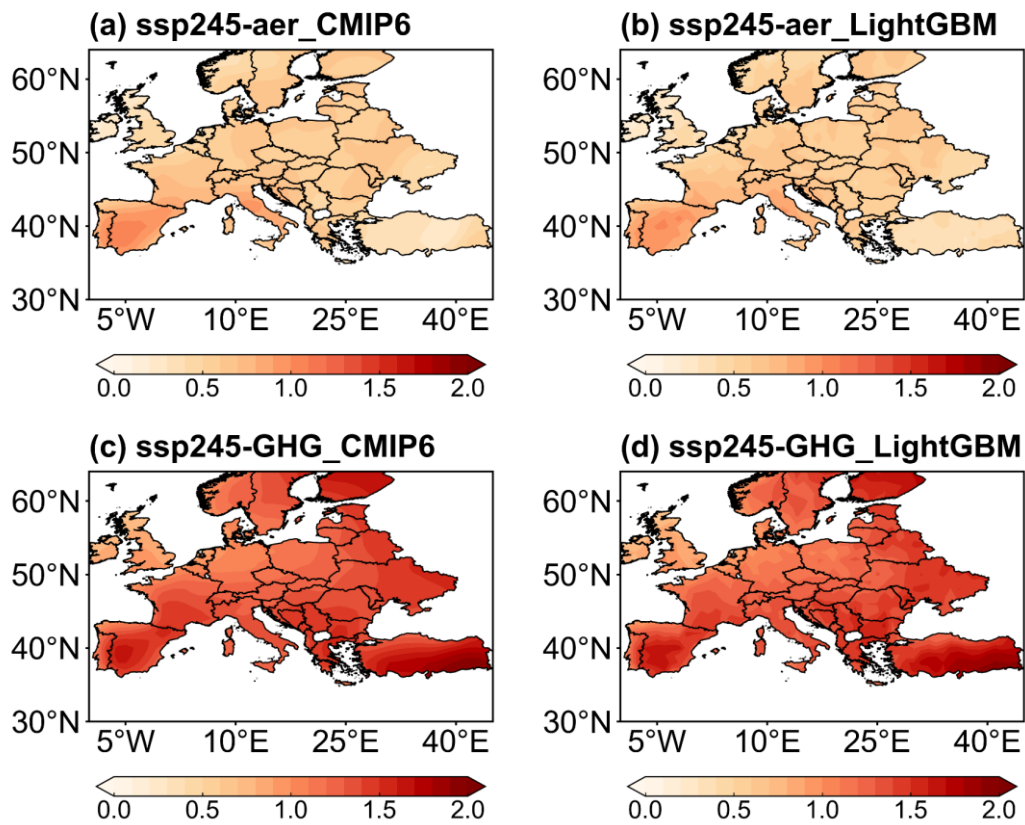

**Figure S6.** Same as Fig.S5, but for Europe.

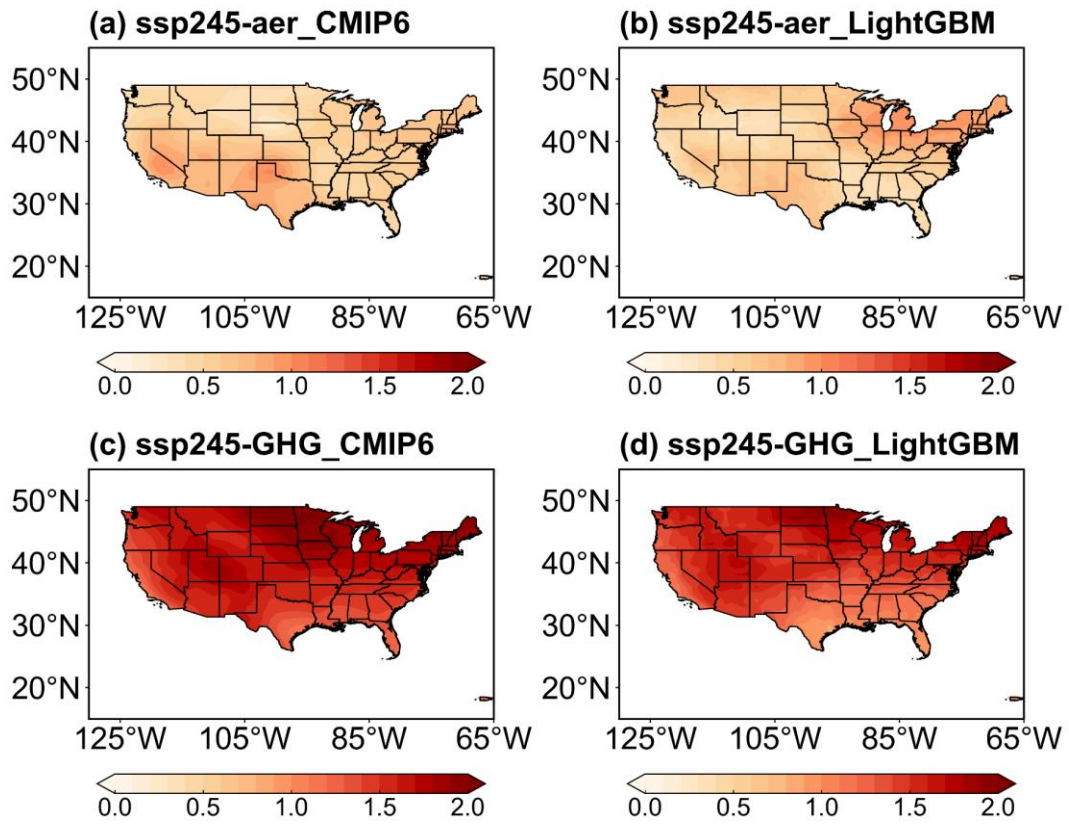

**Figure S7.** Same as Fig.S5, but for North America.

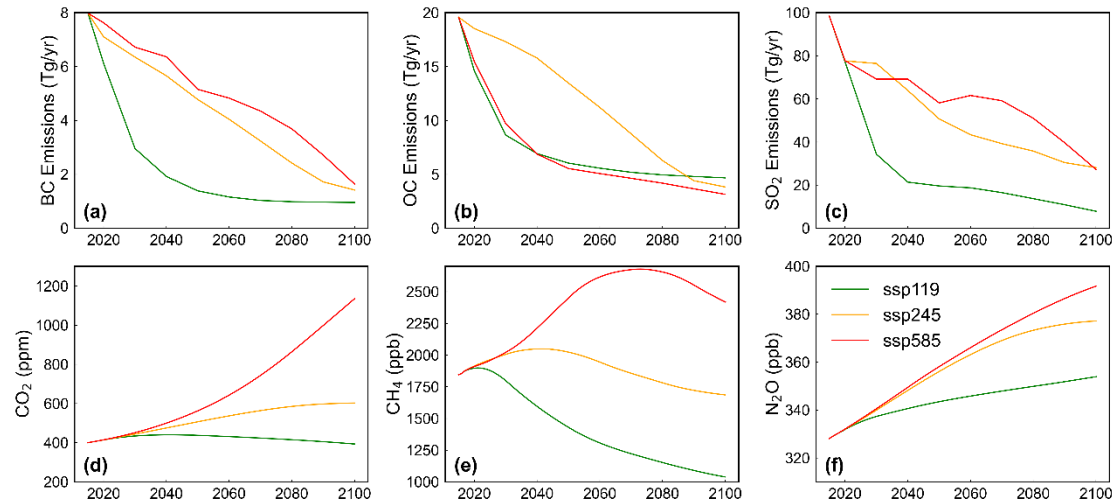

**Figure S8.** Time series of future variations in global anthropogenic emissions of aerosols or precursors (BC, unit: Tg C/yr, OC, unit: Tg C/yr, and SO<sub>2</sub>, unit: Tg SO<sub>2</sub>/yr) and GHGs concentrations (CO<sub>2</sub>, unit: ppm, CH<sub>4</sub>, unit: ppb and N<sub>2</sub>O, unit: ppb).

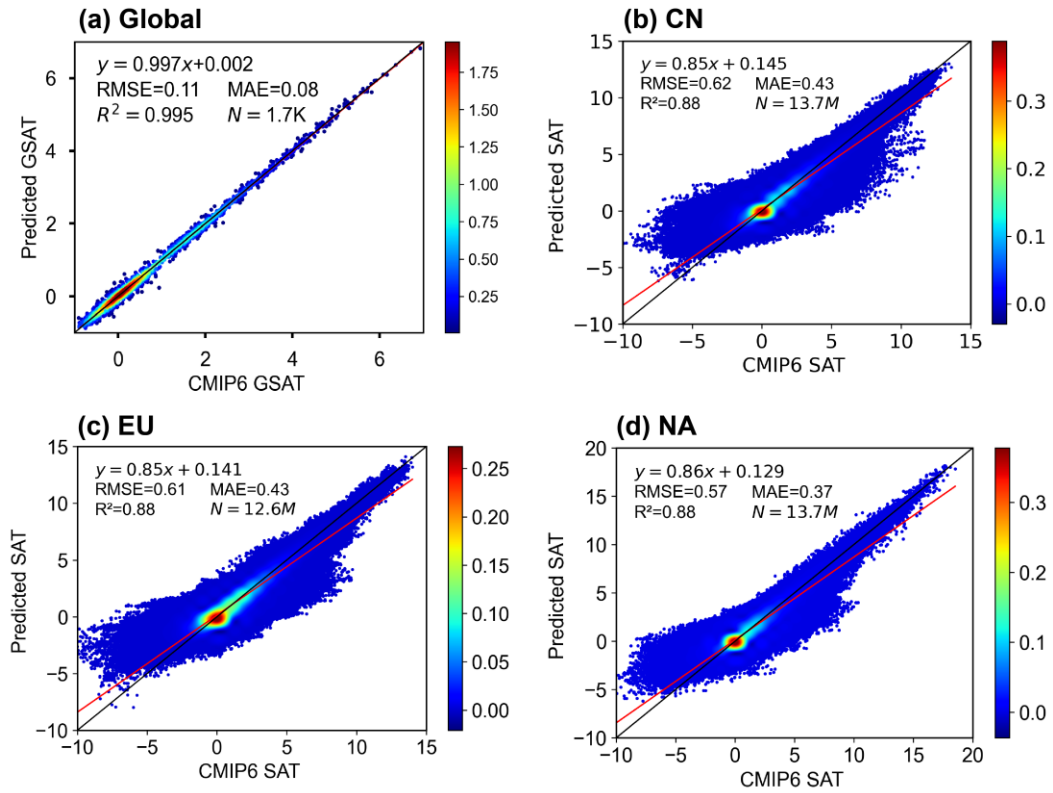

**Figure S9.** Scatterplot of the SAT density ( $^{\circ}C$ ) of the XGBoost models for (a) Global, (b) China, (c) Europe, and (d) North America.

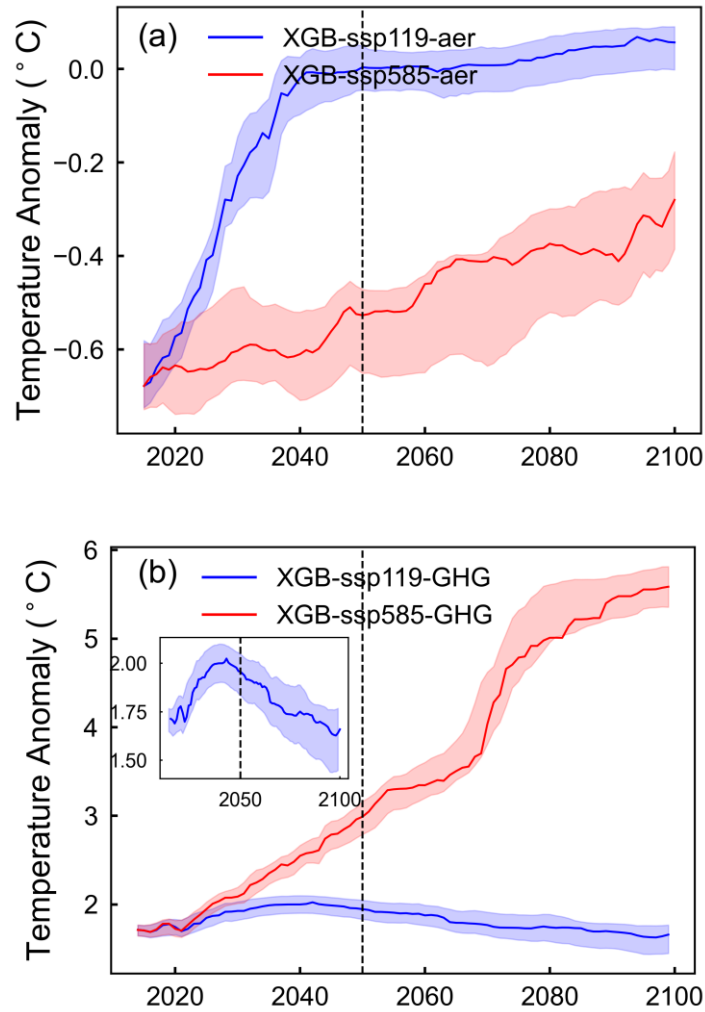

**Figure S10.** Time series of XGBoost-predicted GSAT anomalies (°C) during 2015–2100 under the SSP1-1.9 and SSP5-8.5 due to changes in (a) anthropogenic aerosols and (b) GHGs. The inner figure in (b) is the GSAT anomalies due to changes in GHGs under the SSP1-1.9 scenario. Shaded areas indicate the range of the ML prediction by random separation of training and testing datasets for 100 times.

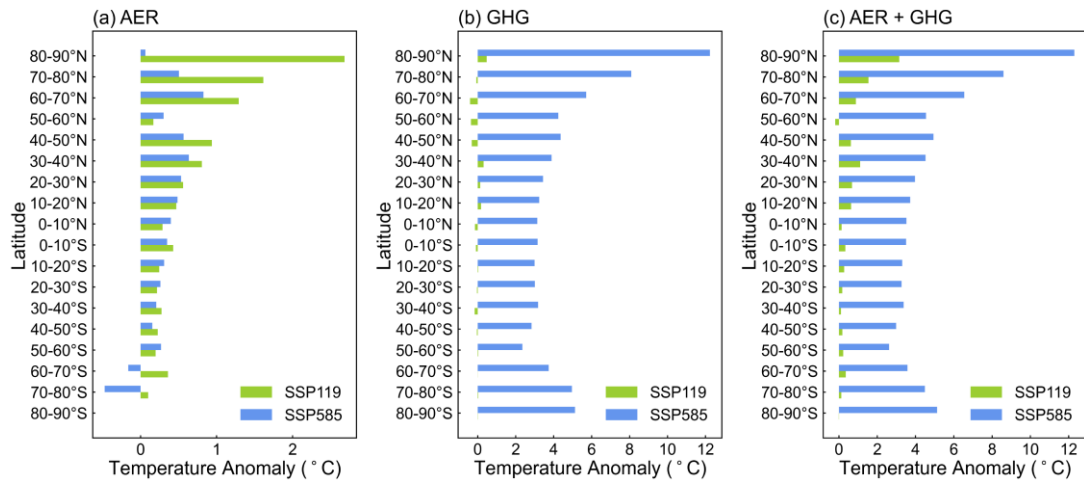

**Figure S11.** Attribution of changes in SAT (°C) in each 10° latitudinal band from 90°S to 90°N to future changes in (a) anthropogenic aerosols, (b) GHGs and (c) both of them in 2095 (averaged 2091–2100) relative to 2020 (averaged over 2015–2024) under the SSP1-1.9 and SSP5-8.5 scenarios predicted by the XGBoost models.

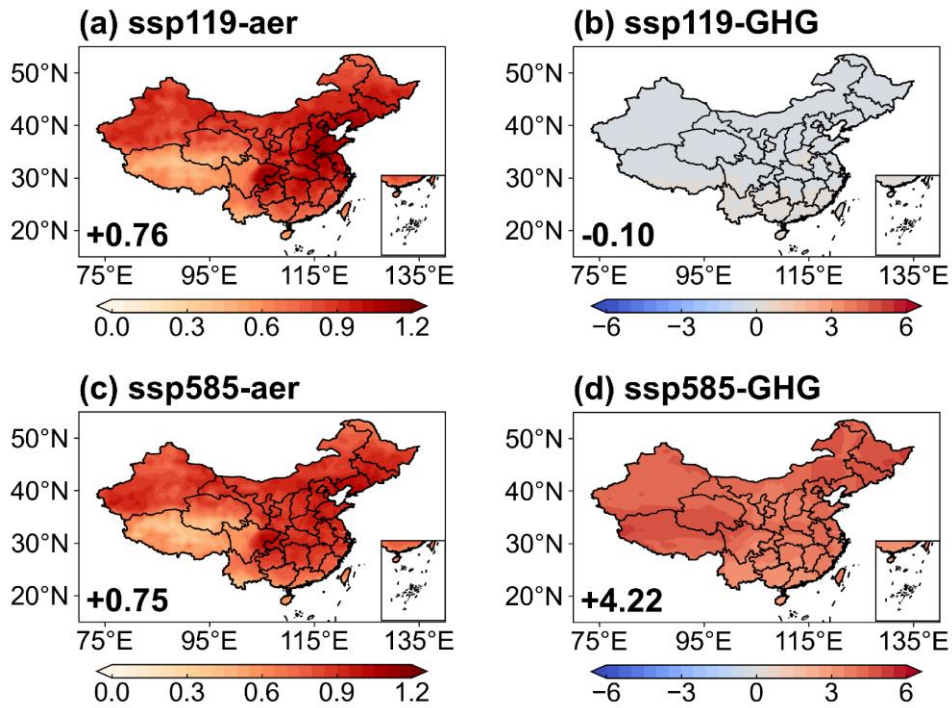

**Figure S12.** Attribution of changes in SAT (°C) in China to future changes in anthropogenic (a, c) aerosols and (b, d) GHGs in 2095 (averaged 2091–2100) relative to 2020 (averaged over 2015–2024) under the SSP1-1.9 and SSP5-8.5 predicted by the XGBoost models. The regional averages are shown in the bottom left of each panel.

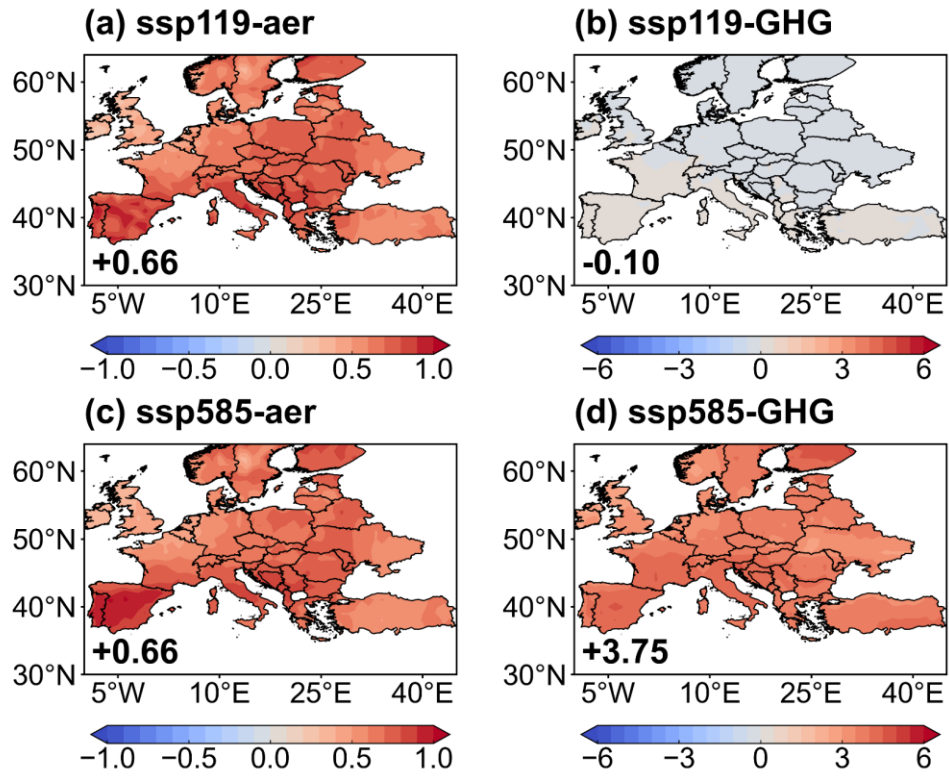

**Figure S13.** Same as Fig. S12, but for Europe.

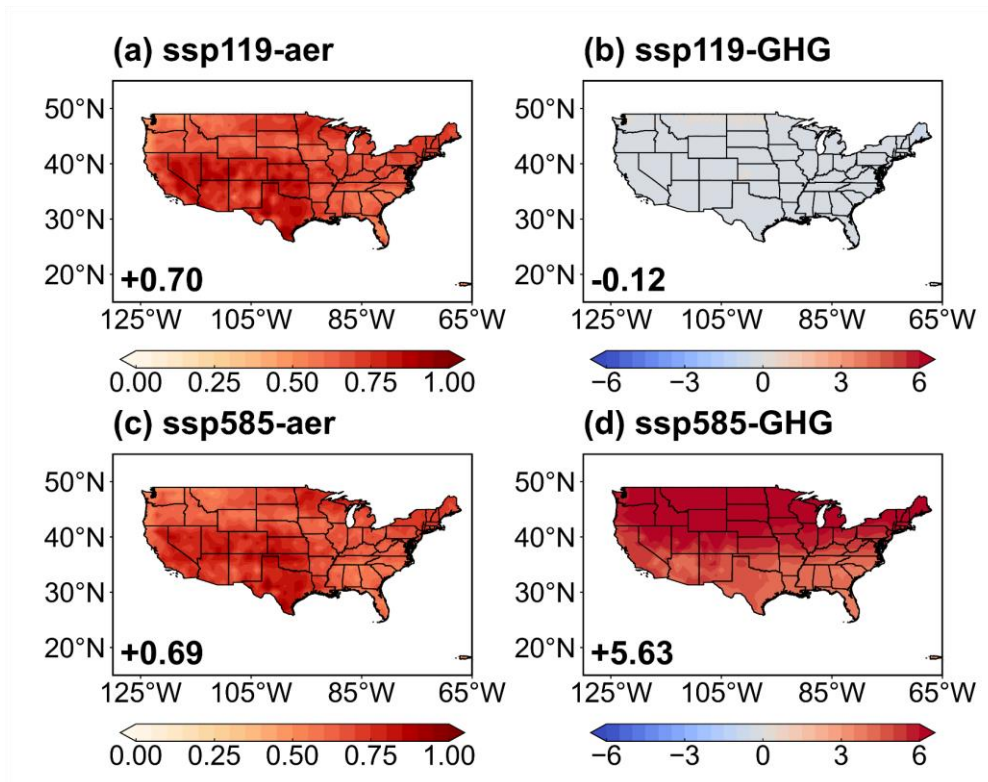

**Figure S14.** Same as Fig.S12, but for North America.
